# Supplementary material
Source: MDPI journal article supplement (https://www.mdpi.com/2079-6412/10/11/1069)
Supplement: s1 [file s1]

# Supplementary Materials: Enhanced Electrical Properties and Stability of P-Type Conduction in ZnO Transparent Semiconductor Thin Films by Co-Doping Ga and N

Chien-Yie Tsay \* and Wan-Yu Chiu

Department of Materials Science and Engineering, Feng Chia University, Taichung 40724, Taiwan;  
Chiuwanyu@gmail.com

\* Correspondence: cytsay@mail.fcu.edu.tw; Tel.: +886-4-2451-7250 (ext. 5312)

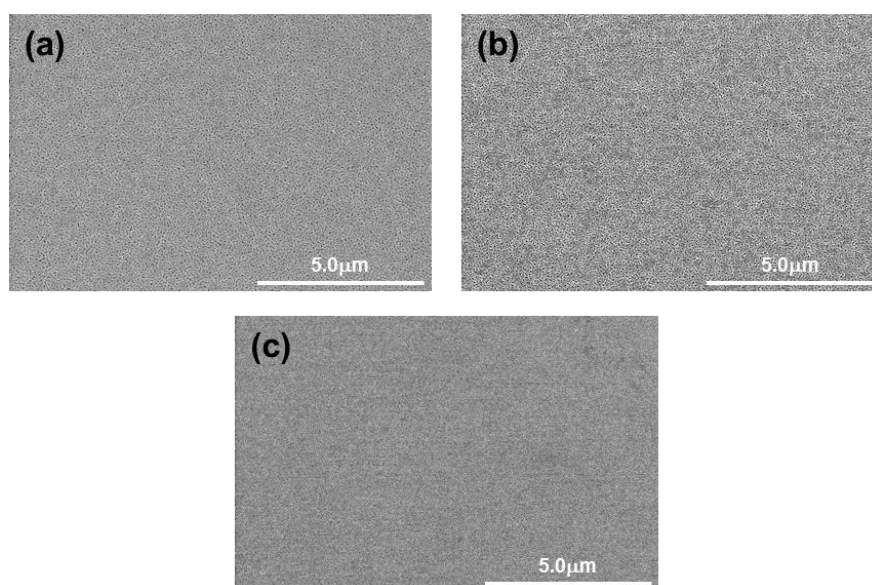

**Figure S1.** Plane-view FE-SEM micrographs of ZnO-based thin films: (a) undoped, (b) N-doped, and (c) Ga–N co-doped samples.

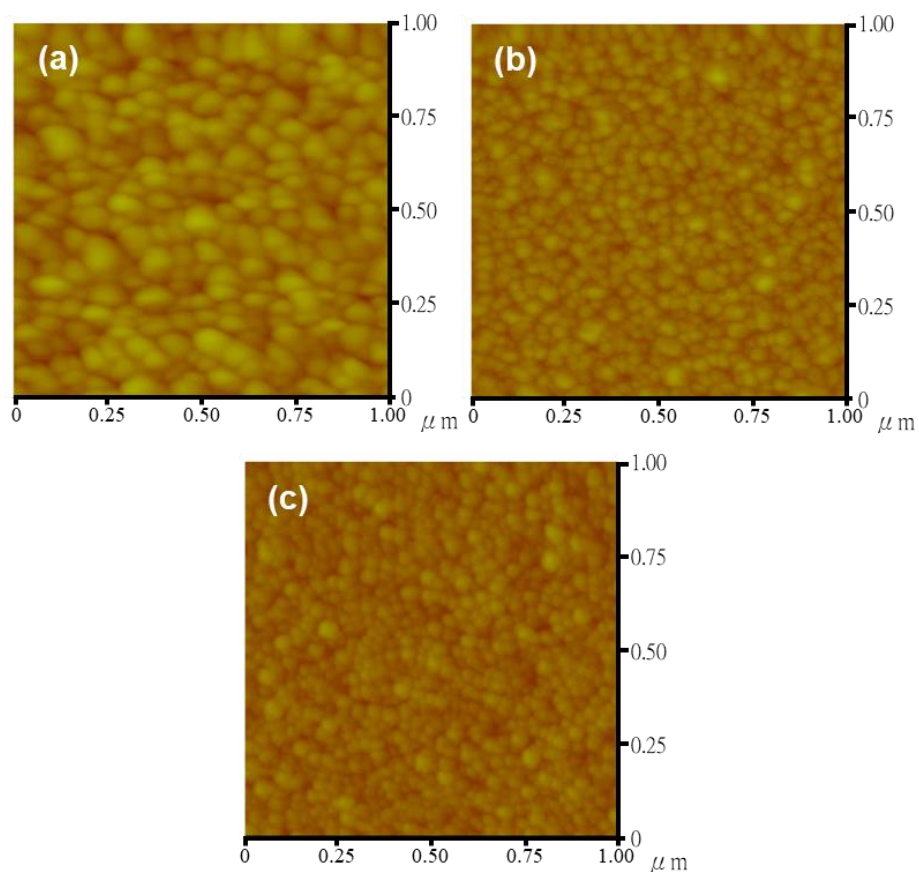

**Figure S2.** 2D SPM images of ZnO-based thin film surfaces: (a) undoped, (b) N-doped, and (c) Ga–N co-doped samples.

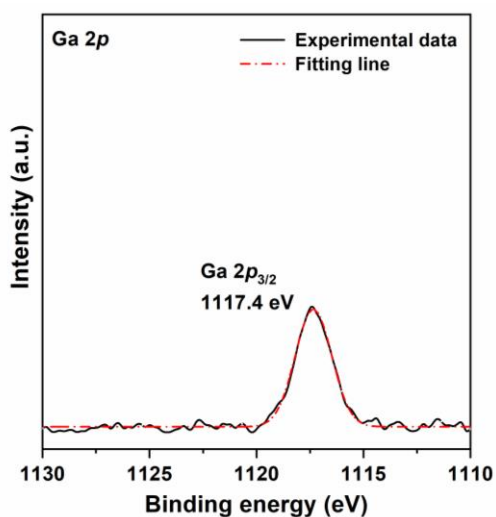

**Figure S3.** Core-level XPS spectrum of Ga 2p of the Ga–N co-doped ZnO thin film.

**Publisher's Note:** MDPI stays neutral with regard to jurisdictional claims in published maps and institutional affiliations.

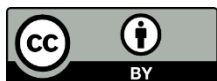

© 2020 by the authors. Submitted for possible open access publication under the terms and conditions of the Creative Commons Attribution (CC BY) license (<http://creativecommons.org/licenses/by/4.0/>).
